# Supplementary material for: Network-Based Integration of Multi-Omics Data Identifies the Determinants of miR-491-5p Effects
Source: MDPI journal article supplement (doi:10.3390/cancers13163970), 2021-08-05

(A)

| Pull-Down<br>+ Transcriptome<br>+ Proteome               | Pull-Down                                          | Transcriptome                                               | Proteome                                               |
|----------------------------------------------------------|----------------------------------------------------|-------------------------------------------------------------|--------------------------------------------------------|
| REGULATION OF TRANSPORT                                  | REGULATION OF TRANSPORT                            | REGULATION OF INTRACELLULAR SIGNAL TRANSDUCTION             | CATABOLIC PROCESS                                      |
| REGULATION OF INTRACELLULAR SIGNAL TRANSDUCTION          | HOMEOSTATIC PROCESS                                | POSITIVE REGULATION OF GENE EXPRESSION                      | PROTEIN LOCALIZATION                                   |
| POSITIVE REGULATION OF RESPONSE TO STIMULUS              | CHEMICAL HOMEOSTASIS                               | TISSUE DEVELOPMENT                                          | ESTABLISHMENT OF PROTEIN LOCALIZATION                  |
| TISSUE DEVELOPMENT                                       | POSITIVE REGULATION OF RESPONSE TO STIMULUS        | POSITIVE REGULATION OF BIOSYNTHETIC PROCESS                 | CELLULAR CATABOLIC PROCESS                             |
| INTRACELLULAR SIGNAL TRANSDUCTION                        | BIOLOGICAL ADHESION                                | INTRACELLULAR SIGNAL TRANSDUCTION                           | SMALL MOLECULE METABOLIC PROCESS                       |
| POSITIVE REGULATION OF MOLECULAR FUNCTION                | POSITIVE REGULATION OF MOLECULAR FUNCTION          | EMBRYO DEVELOPMENT                                          | ORGANONITROGEN COMPOUND METABOLIC PROCESS              |
| PHOSPHATE CONTAINING COMPOUND METABOLIC PROCESS          | REGULATION OF INTRACELLULAR SIGNAL TRANSDUCTION    | POSITIVE REGULATION OF RESPONSE TO STIMULUS                 | SINGLE ORGANISM CATABOLIC PROCESS                      |
| POSITIVE REGULATION OF CELL COMMUNICATION                | VESICLE MEDIATED TRANSPORT                         | PHOSPHATE CONTAINING COMPOUND METABOLIC PROCESS             | MACROMOLECULAR COMPLEX ASSEMBLY                        |
| REGULATION OF PHOSPHORUS METABOLIC PROCESS               | ION TRANSPORT                                      | ORGAN MORPHOGENESIS                                         | ESTABLISHMENT OF LOCALIZATION IN CELL                  |
| HOMEOSTATIC PROCESS                                      | INTRACELLULAR SIGNAL TRANSDUCTION                  | POSITIVE REGULATION OF MOLECULAR FUNCTION                   | PROTEIN COMPLEX SUBUNIT ORGANIZATION                   |
| REGULATION OF MULTICELLULAR ORGANISMAL DEVELOPMENT       | TISSUE DEVELOPMENT                                 | REGULATION OF PHOSPHORUS METABOLIC PROCESS                  | REGULATION OF CELLULAR RESPONSE TO STRESS              |
| RESPONSE TO OXYGEN CONTAINING COMPOUND                   | PROTEIN LOCALIZATION                               | POSITIVE REGULATION OF CELL COMMUNICATION                   | SINGLE ORGANISM BIOSYNTHETIC PROCESS                   |
| CELLULAR RESPONSE TO ORGANIC SUBSTANCE                   | ORGAN MORPHOGENESIS                                | REGULATION OF RESPONSE TO STRESS                            | PHOSPHATE CONTAINING COMPOUND METABOLIC PROCESS        |
| REGULATION OF RESPONSE TO STRESS                         | NEGATIVE REGULATION OF MOLECULAR FUNCTION          | REGULATION OF PROTEIN MODIFICATION PROCESS                  | REGULATION OF RESPONSE TO STRESS                       |
| PROTEIN LOCALIZATION                                     | REGULATION OF MULTICELLULAR ORGANISMAL DEVELOPMENT | CELL DEVELOPMENT                                            | RESPONSE TO OXYGEN CONTAINING COMPOUND                 |
| REGULATION OF PROTEIN MODIFICATION PROCESS               | LIPID METABOLIC PROCESS                            | REGULATION OF TRANSCRIPTION FROM RNA POLYMERASE II PROMOTER | ORGANIC ACID METABOLIC PROCESS                         |
| EMBRYO DEVELOPMENT                                       | POSITIVE REGULATION OF CATALYTIC ACTIVITY          | REGULATION OF CELL DEATH                                    | PROTEIN COMPLEX BIOGENESIS                             |
| POSITIVE REGULATION OF GENE EXPRESSION                   | NEGATIVE REGULATION OF RESPONSE TO STIMULUS        | CELLULAR RESPONSE TO ORGANIC SUBSTANCE                      | POSITIVE REGULATION OF CELLULAR COMPONENT ORGANIZATION |
| IMMUNE SYSTEM PROCESS                                    | REGULATION OF CELL PROLIFERATION                   | ANATOMICAL STRUCTURE FORMATION INVOLVED IN MORPHOGENESIS    | LIPID METABOLIC PROCESS                                |
| ANATOMICAL STRUCTURE FORMATION INVOLVED IN MORPHOGENESIS | CELLULAR RESPONSE TO ORGANIC SUBSTANCE             | CELL DEATH                                                  | VESICLE MEDIATED TRANSPORT                             |

(B)

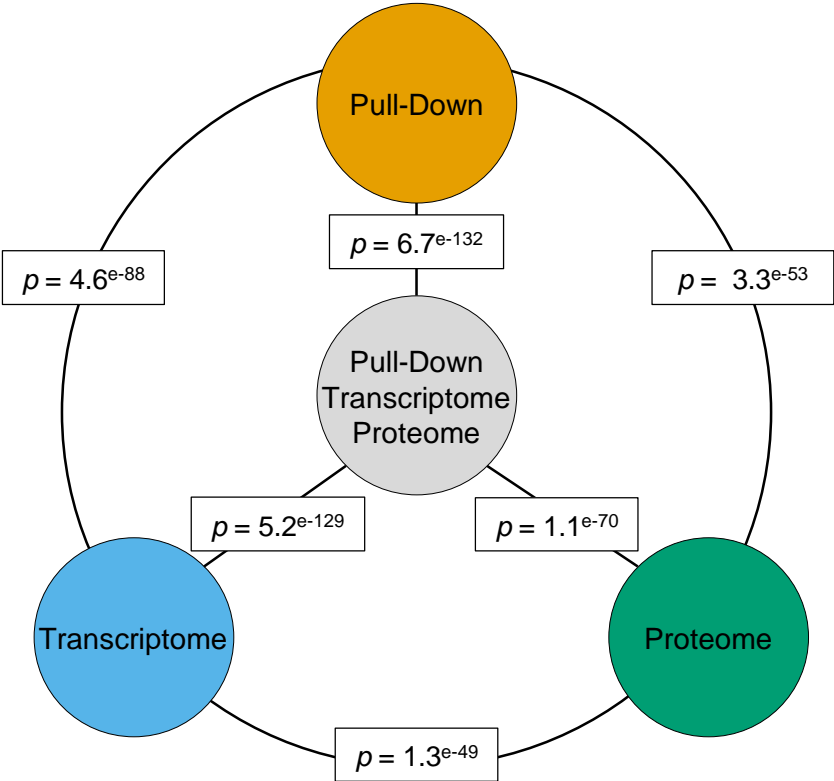

Supplement: s1 [file s1]
