# Supplementary material for: Network-Based Integration of Multi-Omics Data Identifies the Determinants of miR-491-5p Effects
Source: MDPI journal article supplement (doi:10.3390/cancers13163970), 2021-08-05

(A)

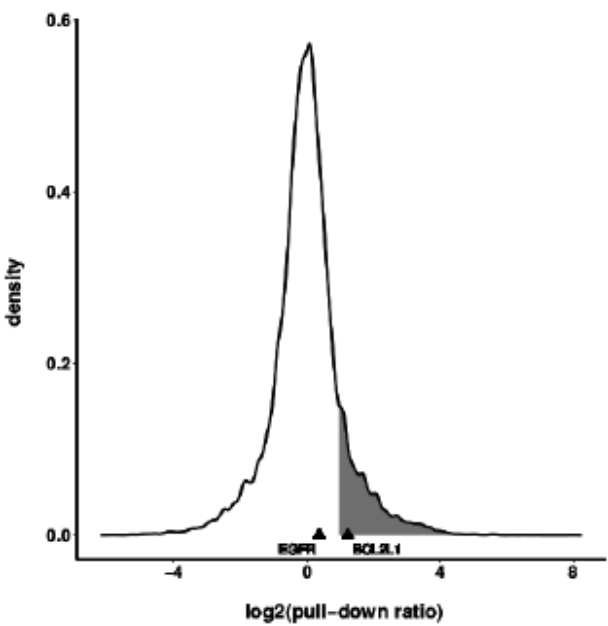

(B)

| Considered experiments               | Number of genes |
|--------------------------------------|-----------------|
| Pull-Down + Transcriptome + Proteome | 3,647 genes     |
| Pull-Down + Transcriptome            | 3,363 genes     |
| Pull-Down + Proteome                 | 3,097 genes     |
| Transcriptome + Proteome             | 1,037 genes     |
| Pull-Down                            | 2,754 genes     |
| Transcriptome                        | 739 genes       |
| Proteome                             | 371 genes       |

(C)

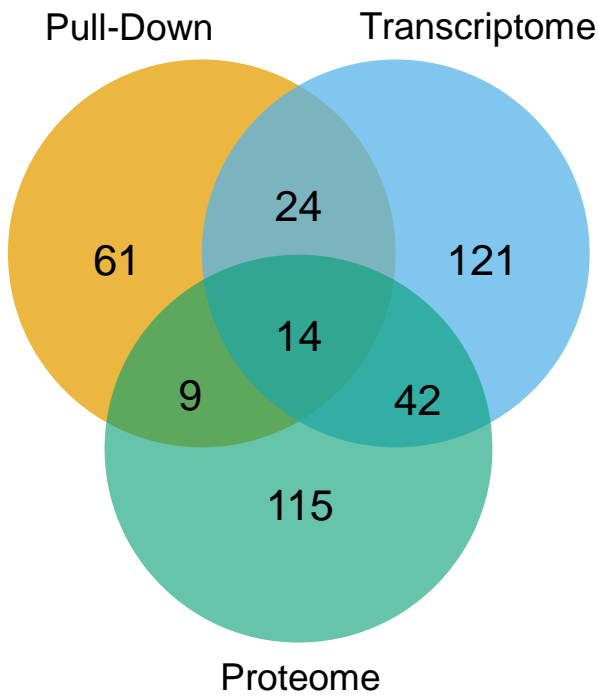

Supplement: s1 [file s1]
