# Supplementary material for: Network-Based Integration of Multi-Omics Data Identifies the Determinants of miR-491-5p Effects
Source: Cancers (Basel). 2021 Aug 5;13(16):3970. doi: 10.3390/cancers13163970 (PMC8393872; doi:10.3390/cancers13163970)
Supplement: Supplementary file 1 [file cancers-13-03970-s001.zip]

Archive with 11 entries (11 files):
- Figure S1.pdf
- Figure S2.pdf
- Figure S3.pdf
- Figure S4.pdf
- Figure S5.pdf
- Figure S6.pdf
- Figure S7.pdf
- supplementary_MMF_MV.pdf
- Table S1.xlsx
- Table S2.xlsx
- Table S3.xlsx
