# Supplementary material for: Network-Based Integration of Multi-Omics Data Identifies the Determinants of miR-491-5p Effects
Source: Cancers (Basel). 2021 Aug 5;13(16):3970. doi: 10.3390/cancers13163970 (PMC8393872; doi:10.3390/cancers13163970)
Supplement: Supplementary file 1 [file cancers-13-03970-s001.zip › Table S1.xlsx]

## Sheet: Table S1
	Considered experiments	Number of connected genes	Number of edges	Average number of neighbors
	Pull-Down + Transcriptome + Proteome	1,645 genes	9.278	12.27
	Pull-Down + Transcriptome	1,365 genes	6.606	9.67
	Pull-Down + Proteome	1,125 genes	4.687	8.33
	Transcriptome + Proteome	822 genes	3.308	8.04
	Pull-Down	785 genes	2.45	6.24
	Transcriptome	550 genes	1.699	6.16
	Proteome	248 genes	519	4.19
