# Supplementary material for: Network-Based Integration of Multi-Omics Data Identifies the Determinants of miR-491-5p Effects
Source: Cancers (Basel). 2021 Aug 5;13(16):3970. doi: 10.3390/cancers13163970 (PMC8393872; doi:10.3390/cancers13163970)
Supplement: Supplementary file 1 [file cancers-13-03970-s001.zip › Table S2.xlsx]

## Sheet: Table S2
	Gene Symbol	Pull-Down	Transcriptome	Proteome
		ratio	fold change	fold change
	EGFR	0.4	-1.73	-1.4
	CTNNB1	0.36	-0.18	-0.75
	RAC3	1.36	-0.06	ND
	EP300	0.19	-0.25	-0.77
	RHOB	1.03	-0.74	ND
	BCL2L1	1.25	-0.67	ND
	RRAS	0.57	-0.74	-0.21
