# Supplementary material for: Network-Based Integration of Multi-Omics Data Identifies the Determinants of miR-491-5p Effects
Source: Cancers (Basel). 2021 Aug 5;13(16):3970. doi: 10.3390/cancers13163970 (PMC8393872; doi:10.3390/cancers13163970)
Supplement: Supplementary file 1 [file cancers-13-03970-s001.zip › Table S3.xlsx]

## Sheet: Table S3
	Gene Symbol	Pull-Down	Transcriptome	Proteome	Reference (PMID)
		ratio	fold change	fold change	for validated target
	BCL2L1	1.25	-0.67	ND	25299770
	EGFR	0.4	-1.73	-1.4	25299770
	GIT1	1.33	-1.41	-0.79	24335959
	FGFR4	1.5	-0.52	ND	29569792
	SNAIL	1.46	-1.02	ND	29312807
	PDGFRA	1.06	-0.15	ND	29569792
	FOXP4	2.09	-1.04	ND	27704627
	IGF2BP1	0.22	-0.52	-0.34	27158341
	TP53	0.1	0.15	ND	23519249
	MMP9	ND	-0.15	ND	23257658
	NOTCH3	0.57	-0.11	ND	27035429
	KDM4B	0.89	-0.44	-0.75	25725194
