# Supplementary figures and images for: Network-Based Integration of Multi-Omics Data Identifies the Determinants of miR-491-5p Effects
Source: MDPI journal article supplement (doi:10.3390/cancers13163970), 2021-08-05

(A)

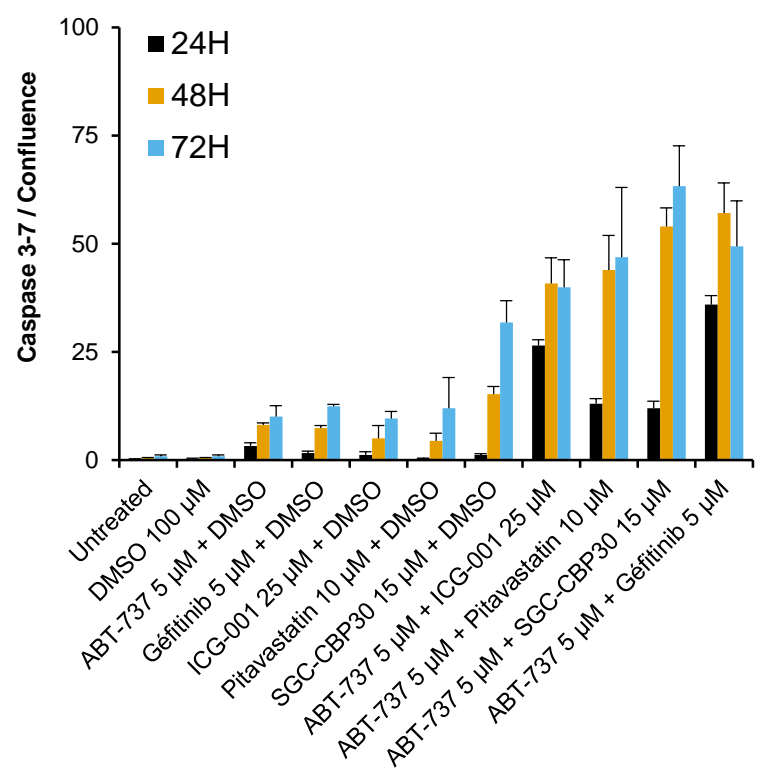

(B)

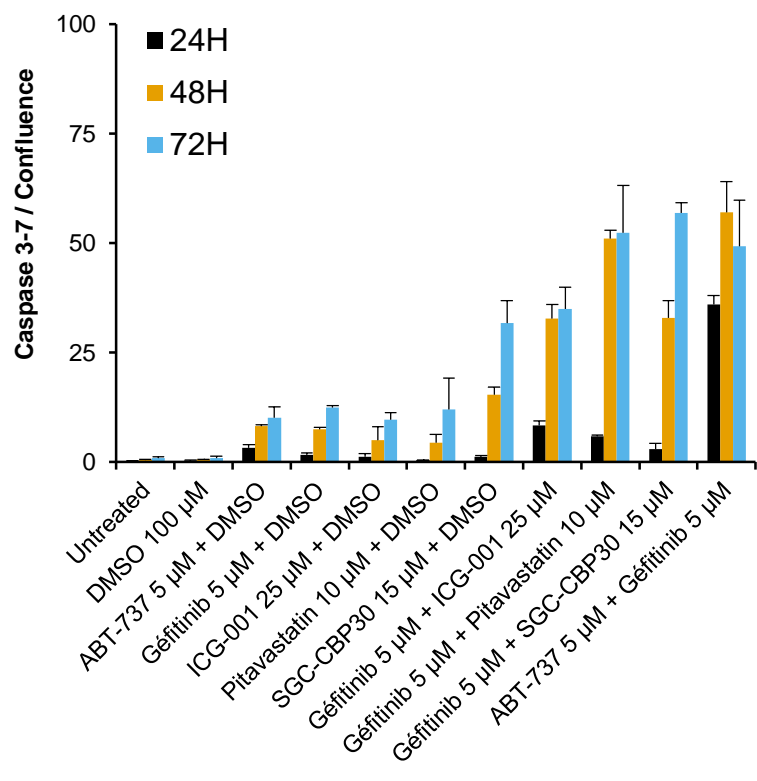

Supplement: s1 [file s1]

(A)

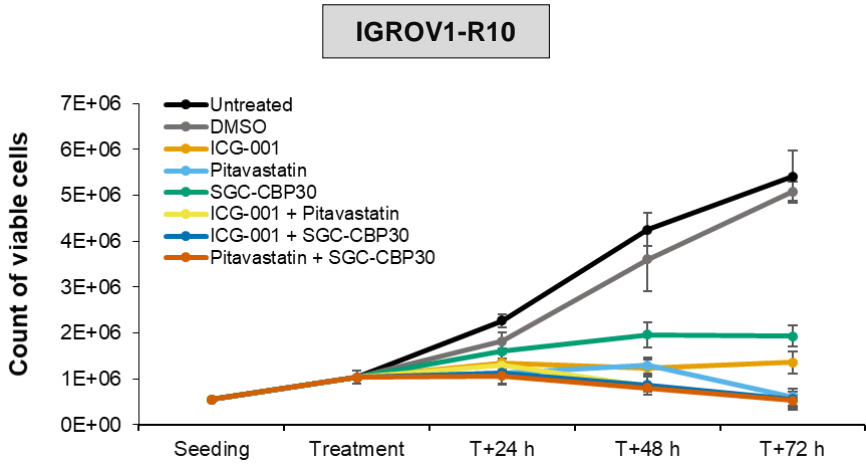

(B)

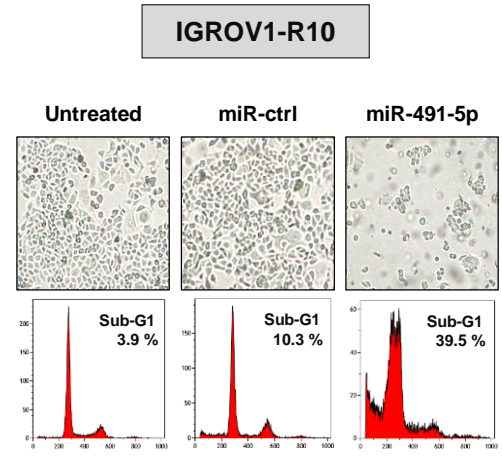

(C)

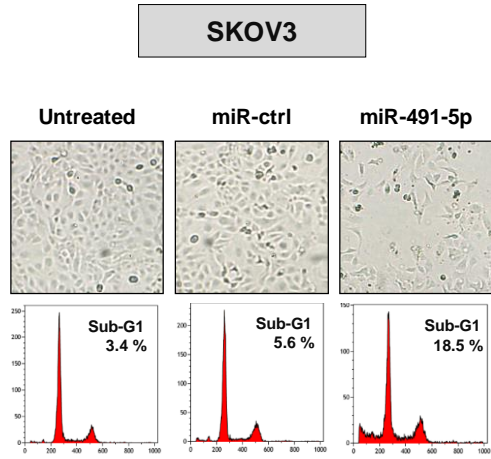

(D)

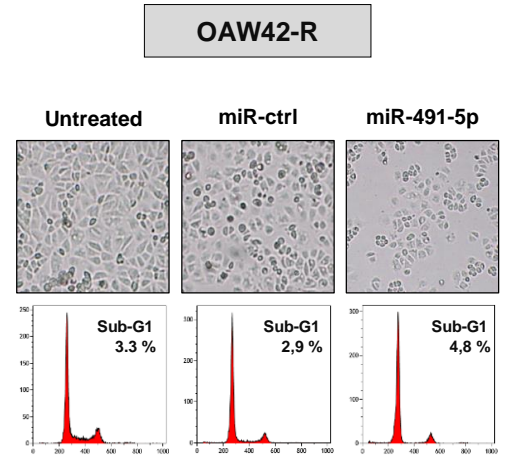

(E)

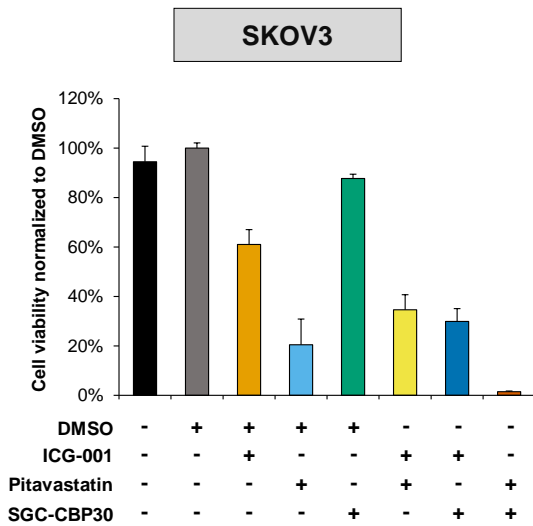

(F)

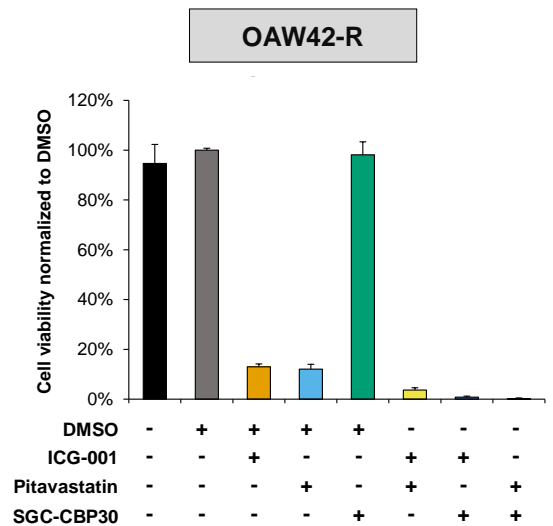

Supplement: s1 [file s1]

(A)

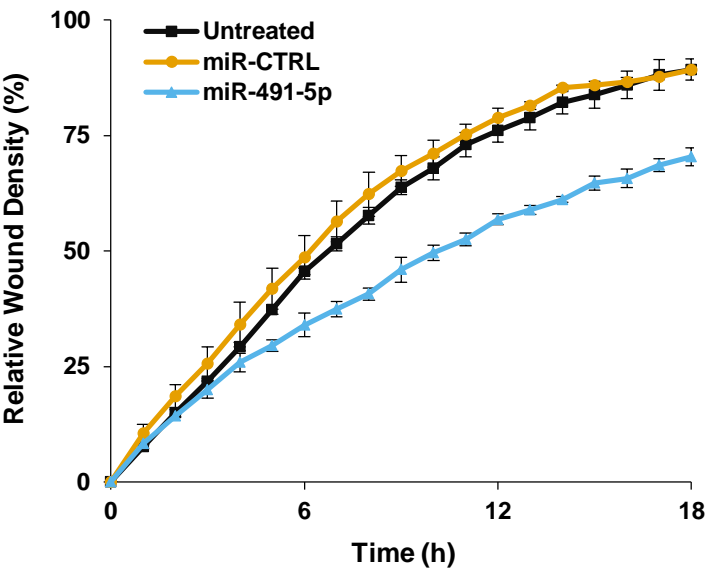

(B)

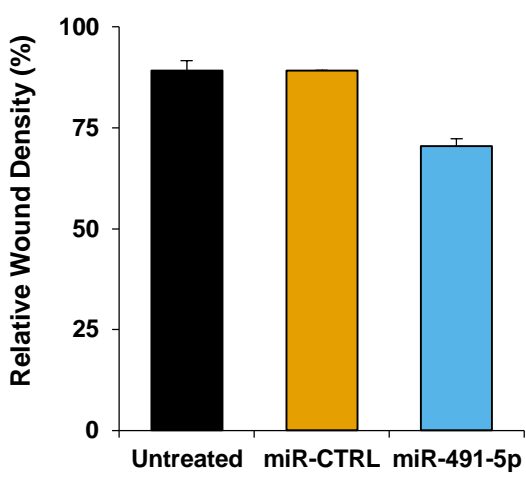

(C)

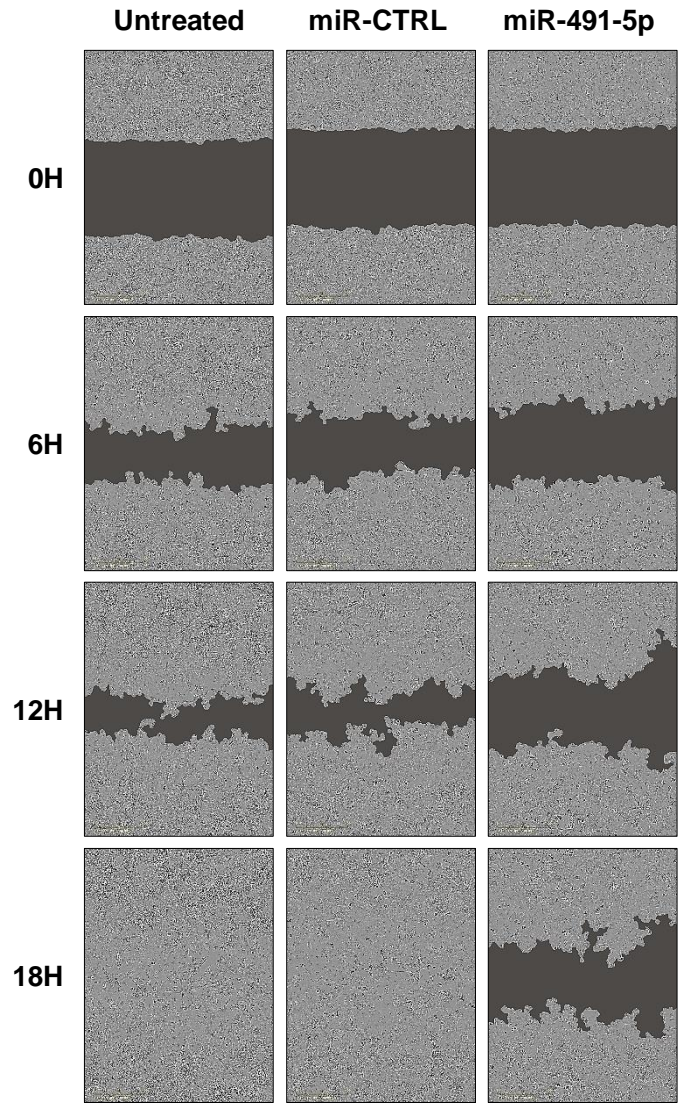

Supplement: s1 [file s1]
